# Supplementary material for: Mechanistic Target of Rapamycin Complex 1 Signaling Links Hypoxia to Increased IGFBP-1 Phosphorylation in Primary Human Decidualized Endometrial Stromal Cells
Source: MDPI journal article supplement (doi:10.3390/biom11091382), 2021-09-18
Supplement: s1 [file s1]

## IGFBP1\_isolationlist

| Mass [m/z] | CS [z] | Polarity | NCE | Comment                                           |
|------------|--------|----------|-----|---------------------------------------------------|
| 765.922989 | 2      | Positive | 27  | ALPGEQQPLHALTR (light)                            |
| 773.319775 | 3      | Positive | 27  | AQETS[+80.0]GEEIS[+80.0]KFYLPNCNK (light)         |
| 746.664331 | 3      | Positive | 27  | AQETSGEEIS[+80.0]KFYLPNCNK (light)                |
| 746.664331 | 3      | Positive | 27  | AQETS[+80.0]GEEISKFYLPNCNK (light)                |
| 1079.50969 | 2      | Positive | 27  | AQETSGEEISKFYLPNCNK (light)                       |
| 720.008888 | 3      | Positive | 27  | AQETSGEEISKFYLPNCNK (light)                       |
| 1464.09139 | 2      | Positive | 27  | DASAPHAEEAGSPES[+80.0]PES[+80.0]TEITEEELL (light) |
| 976.396683 | 3      | Positive | 27  | DASAPHAEEAGSPES[+80.0]PES[+80.0]TEITEEELL (light) |
| 1424.10822 | 2      | Positive | 27  | DASAPHAEEAGSPESPES[+80.0]TEITEEELL (light)        |
| 949.741239 | 3      | Positive | 27  | DASAPHAEEAGSPESPES[+80.0]TEITEEELL (light)        |
| 1424.10822 | 2      | Positive | 27  | DASAPHAEEAGSPES[+80.0]PESTEITEEELL (light)        |
| 949.741239 | 3      | Positive | 27  | DASAPHAEEAGSPES[+80.0]PESTEITEEELL (light)        |
| 923.085796 | 3      | Positive | 27  | DASAPHAEEAGSPESPESTEITEEELL (light)               |
| 430.52041  | 3      | Positive | 27  | DNFHLMAPSEE (light)                               |
| 765.922989 | 2      | Positive | 27  | ALPGEQQPLHALTR (light)                            |
| 1079.50969 | 2      | Positive | 27  | AQETSGEEISKFYLPNCNK (light)                       |
| 430.52041  | 3      | Positive | 27  | DNFHLMAPSEE (light)                               |
| 685.260143 | 2      | Positive | 27  | DNFHLMAPS[+80.0]EE (light)                        |
| 457.175854 | 3      | Positive | 27  | DNFHLMAPS[+80.0]EE (light)                        |
| 433.210189 | 2      | Positive | 27  | CARGLSCR (light)                                  |
| 289.142551 | 3      | Positive | 27  | CARGLSCR (light)                                  |
| 473.193354 | 2      | Positive | 27  | CARGLS[+80.0]CR (light)                           |
| 315.797995 | 3      | Positive | 27  | CARGLS[+80.0]CR (light)                           |
| 859.406042 | 3      | Positive | 27  | DFIWGFGKQGFCQVCCFVHK (light)                      |
| 485.216556 | 3      | Positive | 27  | RCHEFVTFSCPGA (light)                             |
| 960.12063  | 3      | Positive | 27  | IHTYGSPTFCDHCGSLLYGLIHQGMK (light)                |
| 937.939141 | 2      | Positive | 27  | DHCGSLLYGLIHQGMKC (light)                         |
| 663.312202 | 3      | Positive | 27  | DMNVHKQCVINVPSLCGM (light)                        |
| 937.433888 | 2      | Positive | 27  | QCVINVPSLCGMDHTEK (light)                         |
| 970.499258 | 2      | Positive | 27  | STLNPQWNESFTFKLK (light)                          |
| 856.737234 | 3      | Positive | 27  | DFMGSLSGVSELMKMPASGWYK (light)                    |

|                   |   |          |    |                                  |
|-------------------|---|----------|----|----------------------------------|
| <b>962.121458</b> | 3 | Positive | 27 | MPASGWYKLLNQEEGEYYNVIPEG (light) |
| <b>982.46782</b>  | 2 | Positive | 27 | LLNQEEGEYYNVIPEG (light)         |
| <b>944.972353</b> | 2 | Positive | 27 | PPFLTQLHSCFQTVDR (light)         |
| <b>852.461415</b> | 3 | Positive | 27 | FKEPQAVFYAAEISIGLFFLHK (light)   |
| <b>978.489087</b> | 2 | Positive | 27 | GKYSEVF EAINITNNEK (light)       |
| <b>652.661817</b> | 3 | Positive | 27 | GKYSEVF EAINITNNEK (light)       |
| <b>885.930873</b> | 2 | Positive | 27 | YSEVF EAINITNNEK (light)         |
| <b>590.956341</b> | 3 | Positive | 27 | YSEVF EAINITNNEK (light)         |
| <b>1098.58098</b> | 2 | Positive | 27 | YSEVF EAINITNNEKVVVK (light)     |
| <b>732.723076</b> | 3 | Positive | 27 | YSEVF EAINITNNEKVVVK (light)     |
| <b>564.34278</b>  | 2 | Positive | 27 | EIKILENLR (light)                |
| <b>376.564279</b> | 3 | Positive | 27 | EIKILENLR (light)                |
| <b>797.469772</b> | 2 | Positive | 27 | ILENLRGGPNIITLA (light)          |
| <b>531.982273</b> | 3 | Positive | 27 | ILENLRGGPNIITLA (light)          |
| <b>428.25036</b>  | 2 | Positive | 27 | GGPNIITLA (light)                |
| <b>285.835999</b> | 3 | Positive | 27 | GGPNIITLA (light)                |
| <b>655.887552</b> | 2 | Positive | 27 | GGPNIITLADIVK (light)            |
| <b>437.594127</b> | 3 | Positive | 27 | GGPNIITLADIVK (light)            |
| <b>514.790381</b> | 2 | Positive | 27 | DIVKDPVSR (light)                |
| <b>343.529346</b> | 3 | Positive | 27 | DIVKDPVSR (light)                |
| <b>948.484139</b> | 2 | Positive | 27 | DPVSRTPALVFEHVNNT (light)        |
| <b>632.658518</b> | 3 | Positive | 27 | DPVSRTPALVFEHVNNT (light)        |
| <b>671.343509</b> | 2 | Positive | 27 | TPALVFEHVNNT (light)             |
| <b>447.898098</b> | 3 | Positive | 27 | TPALVFEHVNNT (light)             |
| <b>866.438669</b> | 2 | Positive | 27 | TPALVFEHVNNTDFK (light)          |
| <b>577.961538</b> | 3 | Positive | 27 | TPALVFEHVNNTDFK (light)          |
| <b>628.829703</b> | 2 | Positive | 27 | DFKQLYQTLT (light)               |
| <b>419.55556</b>  | 3 | Positive | 27 | DFKQLYQTLT (light)               |
| <b>572.779679</b> | 2 | Positive | 27 | QLYQTLTDY (light)                |
| <b>382.188878</b> | 3 | Positive | 27 | QLYQTLTDY (light)                |
| <b>745.889237</b> | 2 | Positive | 27 | DIRFYMYEILK (light)              |
| <b>497.59525</b>  | 3 | Positive | 27 | DIRFYMYEILK (light)              |
| <b>553.783178</b> | 2 | Positive | 27 | FYMYEILK (light)                 |
| <b>369.524544</b> | 3 | Positive | 27 | FYMYEILK (light)                 |

|                   |   |          |    |                               |
|-------------------|---|----------|----|-------------------------------|
| <b>645.843767</b> | 2 | Positive | 27 | FYMYEILKAL (light)            |
| <b>430.89827</b>  | 3 | Positive | 27 | FYMYEILKAL (light)            |
| <b>526.781501</b> | 2 | Positive | 27 | DVKPHNVMI (light)             |
| <b>351.523426</b> | 3 | Positive | 27 | DVKPHNVMI (light)             |
| <b>692.830577</b> | 2 | Positive | 27 | PHNVMIDHEHR (light)           |
| <b>462.22281</b>  | 3 | Positive | 27 | PHNVMIDHEHR (light)           |
| <b>1154.06329</b> | 2 | Positive | 27 | LIDWGLAEFYHPGQEYNVR (light)   |
| <b>769.711282</b> | 3 | Positive | 27 | LIDWGLAEFYHPGQEYNVR (light)   |
| <b>1040.97922</b> | 2 | Positive | 27 | DWGLAEFYHPGQEYNVR (light)     |
| <b>694.321906</b> | 3 | Positive | 27 | DWGLAEFYHPGQEYNVR (light)     |
| <b>1247.59855</b> | 2 | Positive | 27 | DWGLAEFYHPGQEYNVRVASR (light) |
| <b>832.068128</b> | 3 | Positive | 27 | DWGLAEFYHPGQEYNVRVASR (light) |
| <b>533.302592</b> | 2 | Positive | 27 | YFKGPELLV (light)             |
| <b>355.87082</b>  | 3 | Positive | 27 | YFKGPELLV (light)             |
| <b>664.315571</b> | 2 | Positive | 27 | GPELLVDYQMY (light)           |
| <b>443.212806</b> | 3 | Positive | 27 | GPELLVDYQMY (light)           |
| <b>599.242072</b> | 2 | Positive | 27 | DYQMYDYSL (light)             |
| <b>399.830473</b> | 3 | Positive | 27 | DYQMYDYSL (light)             |
| <b>499.745776</b> | 2 | Positive | 27 | KEPFFHGH (light)              |
| <b>333.499609</b> | 3 | Positive | 27 | KEPFFHGH (light)              |
| <b>631.764894</b> | 2 | Positive | 27 | EPFFHGHHDNY (light)           |
| <b>421.512355</b> | 3 | Positive | 27 | EPFFHGHHDNY (light)           |
| <b>511.748713</b> | 2 | Positive | 27 | DNYDQLVR (light)              |
| <b>341.501567</b> | 3 | Positive | 27 | DNYDQLVR (light)              |
| <b>471.790184</b> | 2 | Positive | 27 | DQLVRIAK (light)              |
| <b>314.862548</b> | 3 | Positive | 27 | DQLVRIAK (light)              |
| <b>415.752735</b> | 2 | Positive | 27 | IAKVLGTE (light)              |
| <b>277.504249</b> | 3 | Positive | 27 | IAKVLGTE (light)              |
| <b>455.231833</b> | 2 | Positive | 27 | VLGTEDLY (light)              |
| <b>303.823647</b> | 3 | Positive | 27 | VLGTEDLY (light)              |
| <b>510.261456</b> | 2 | Positive | 27 | YNIELDPR (light)              |
| <b>340.510063</b> | 3 | Positive | 27 | YNIELDPR (light)              |
| <b>477.267407</b> | 2 | Positive | 27 | DILGRHSR (light)              |
| <b>318.51403</b>  | 3 | Positive | 27 | DILGRHSR (light)              |

|            |   |          |    |                                      |
|------------|---|----------|----|--------------------------------------|
| 1089.53998 | 2 | Positive | 27 | WERFVHSENQHLSPEAL (light)            |
| 726.695743 | 3 | Positive | 27 | WERFVHSENQHLSPEAL (light)            |
| 853.928468 | 2 | Positive | 27 | FVHSENQHLSPEAL (light)               |
| 569.621404 | 3 | Positive | 27 | FVHSENQHLSPEAL (light)               |
| 1041.51818 | 2 | Positive | 27 | FVHSENQHLSPEALDFL (light)            |
| 694.681211 | 3 | Positive | 27 | FVHSENQHLSPEALDFL (light)            |
| 542.286328 | 2 | Positive | 27 | DHQSRLTAR (light)                    |
| 361.859977 | 3 | Positive | 27 | DHQSRLTAR (light)                    |
| 1028.02204 | 2 | Positive | 27 | LTAREAMEHPYFYTVVK (light)            |
| 685.683787 | 3 | Positive | 27 | LTAREAMEHPYFYTVVK (light)            |
| 807.387059 | 2 | Positive | 27 | EAMEHPYFYTVVK (light)                |
| 538.593798 | 3 | Positive | 27 | EAMEHPYFYTVVK (light)                |
| 1042.49893 | 2 | Positive | 27 | EAMEHPYFYTVVKDQAR (light)            |
| 695.335046 | 3 | Positive | 27 | EAMEHPYFYTVVKDQAR (light)            |
| 1194.04645 | 2 | Positive | 27 | LIDWGLAEFY[+80.0]HPGQEYNVR (light)   |
| 796.366725 | 3 | Positive | 27 | LIDWGLAEFY[+80.0]HPGQEYNVR (light)   |
| 1080.96239 | 2 | Positive | 27 | DWGLAEFY[+80.0]HPGQEYNVR (light)     |
| 720.977349 | 3 | Positive | 27 | DWGLAEFY[+80.0]HPGQEYNVR (light)     |
| 1287.58172 | 2 | Positive | 27 | DWGLAEFY[+80.0]HPGQEYNVRVASR (light) |
| 858.723572 | 3 | Positive | 27 | DWGLAEFY[+80.0]HPGQEYNVRVASR (light) |
| 1247.59855 | 2 | Positive | 27 | DWGLAEFYHPGQEYNVRVASR (light)        |
| 832.068128 | 3 | Positive | 27 | DWGLAEFYHPGQEYNVRVASR (light)        |
| 1287.58172 | 2 | Positive | 27 | DWGLAEFYHPGQEYNVRVAS[+80.0]R (light) |
| 858.723572 | 3 | Positive | 27 | DWGLAEFYHPGQEYNVRVAS[+80.0]R (light) |
| 627.792794 | 2 | Positive | 27 | DGVTTTRTFCGTP (light)                |
| 418.864288 | 3 | Positive | 27 | DGVTTTRTFCGTP (light)                |
| 1174.06939 | 2 | Positive | 27 | TFCGTPDYIAPEIIAYQPYGK (light)        |
| 783.048683 | 3 | Positive | 27 | TFCGTPDYIAPEIIAYQPYGK (light)        |
| 1362.65065 | 2 | Positive | 27 | DQSDFEGFSYVNPQFVHPILQSAV (light)     |
| 908.769525 | 3 | Positive | 27 | DQSDFEGFSYVNPQFVHPILQSAV (light)     |
| 1197.59188 | 2 | Positive | 27 | DFEGFSYVNPQFVHPILQSAV (light)        |
| 798.730342 | 3 | Positive | 27 | DFEGFSYVNPQFVHPILQSAV (light)        |
| 667.77596  | 2 | Positive | 27 | DGVTTTRT[+80.0]FCGTP (light)         |
| 445.519732 | 3 | Positive | 27 | DGVTTTRT[+80.0]FCGTP (light)         |

|                   |   |          |    |                                         |
|-------------------|---|----------|----|-----------------------------------------|
| <b>1214.05255</b> | 2 | Positive | 27 | T[+80.0]FCGTPDYIAPEIIAYQPYGK (light)    |
| <b>809.704127</b> | 3 | Positive | 27 | T[+80.0]FCGTPDYIAPEIIAYQPYGK (light)    |
| <b>1402.63382</b> | 2 | Positive | 27 | DQSDFEGFS[+80.0]YVNPQFVHPILQSAV (light) |
| <b>935.424969</b> | 3 | Positive | 27 | DQSDFEGFS[+80.0]YVNPQFVHPILQSAV (light) |
| <b>1237.57504</b> | 2 | Positive | 27 | DFEGFS[+80.0]YVNPQFVHPILQSAV (light)    |
| <b>825.385786</b> | 3 | Positive | 27 | DFEGFS[+80.0]YVNPQFVHPILQSAV (light)    |
